# Supplementary material
Source: PubMed Central journal article supplement (PMC3116017)

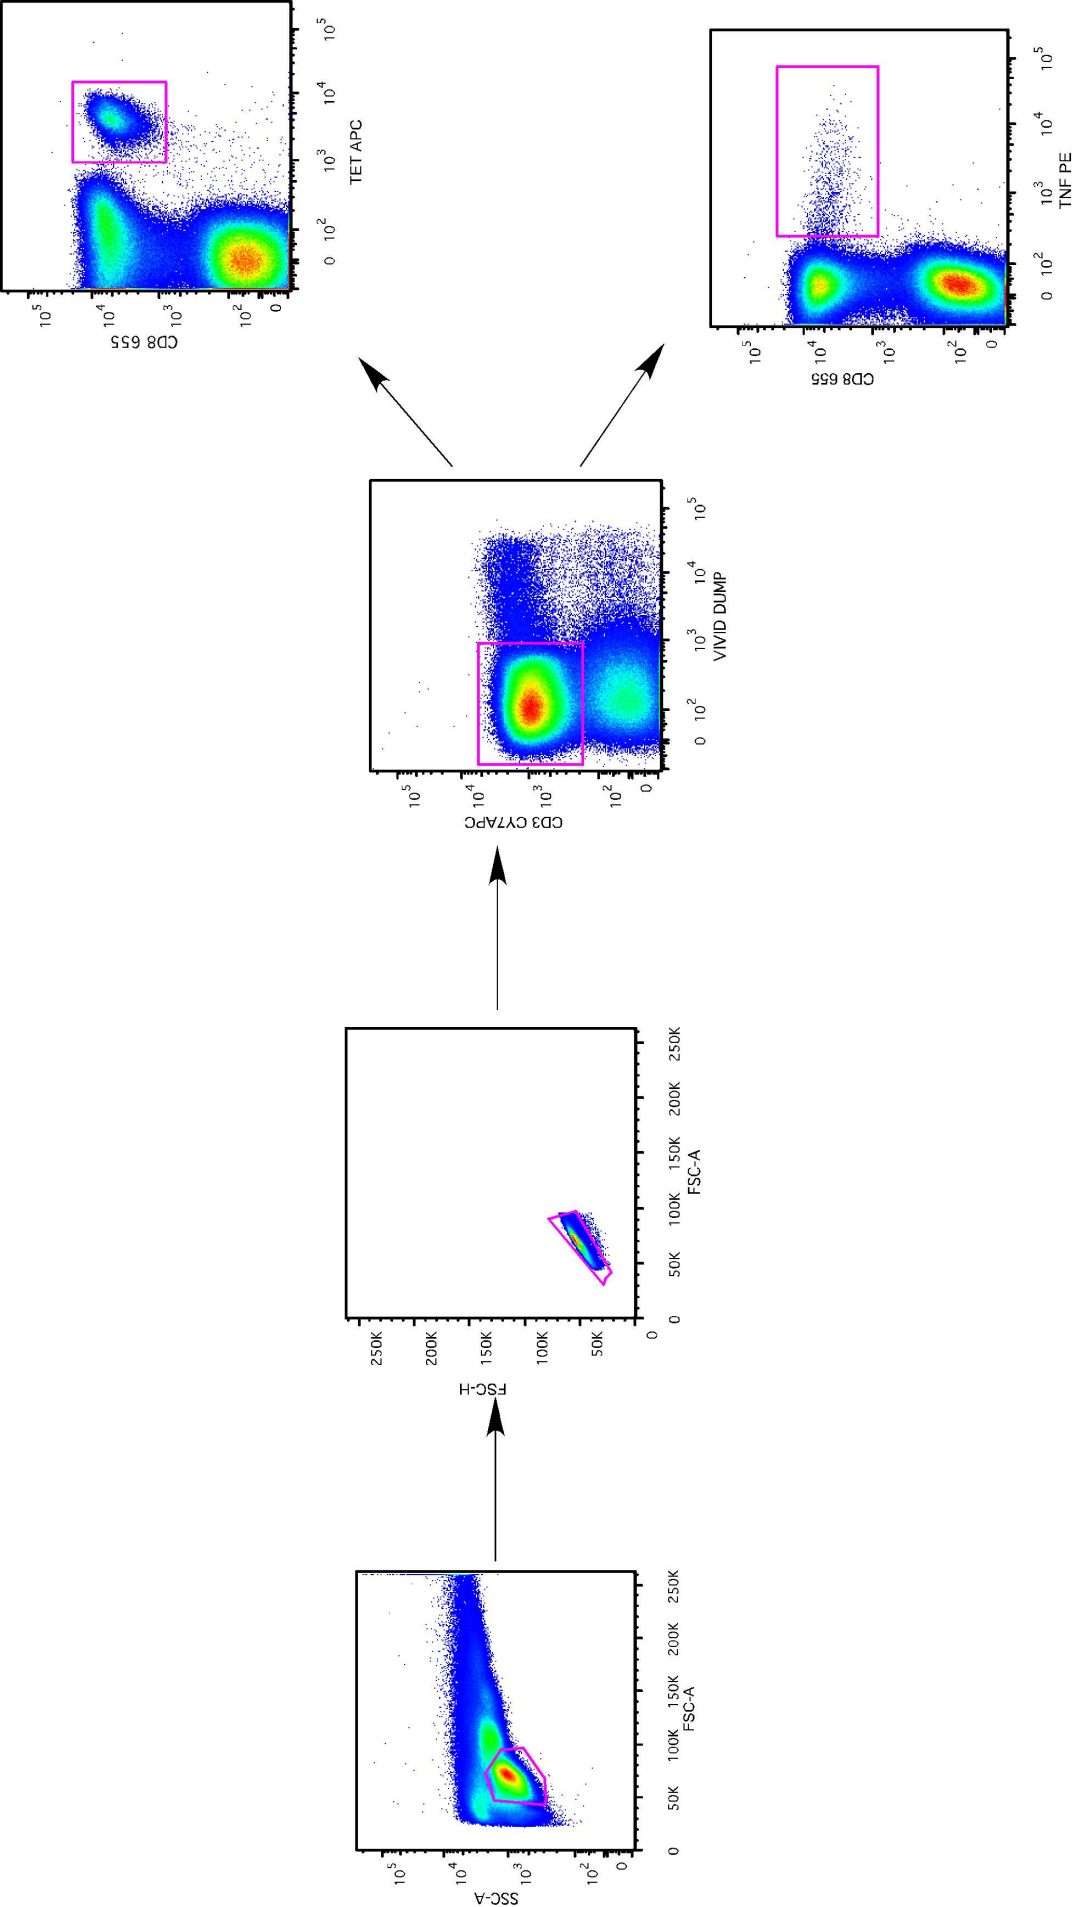

Supplement: NIHMS294555-supplement-01.pdf [file NIHMS294555-supplement-01.pdf]

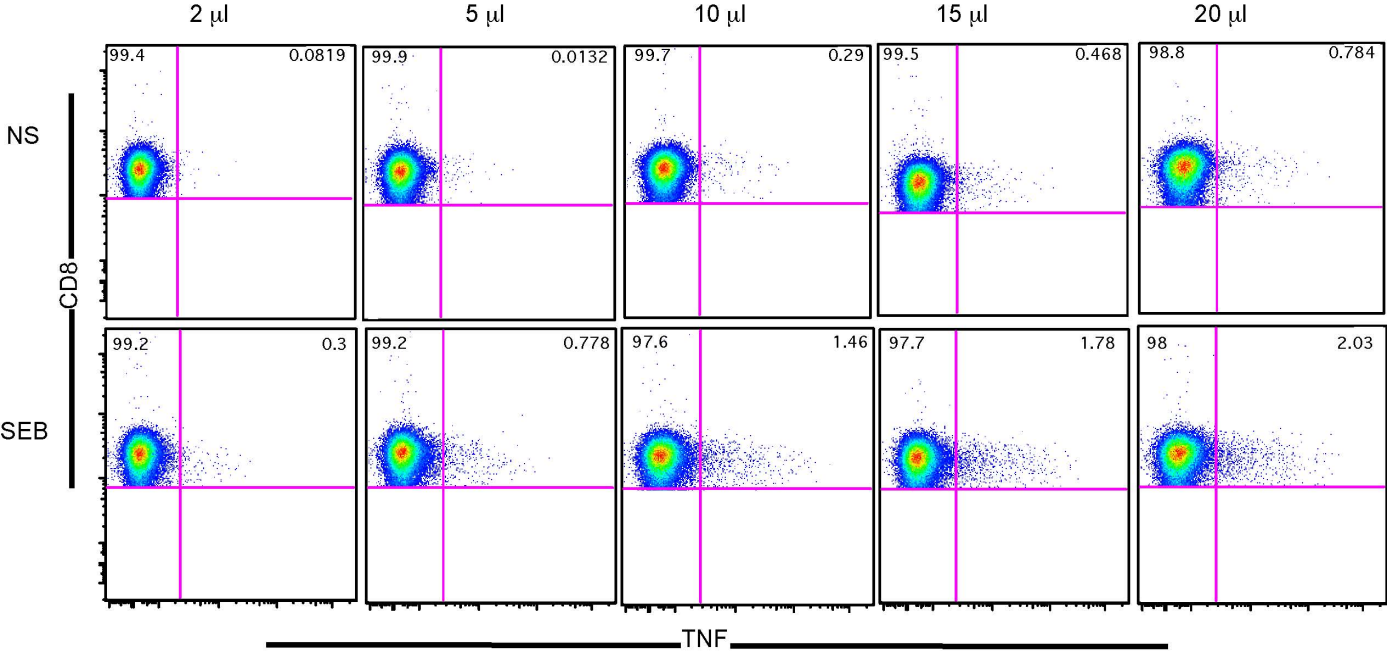

Supplement: NIHMS294555-supplement-02.pdf [file NIHMS294555-supplement-02.pdf]

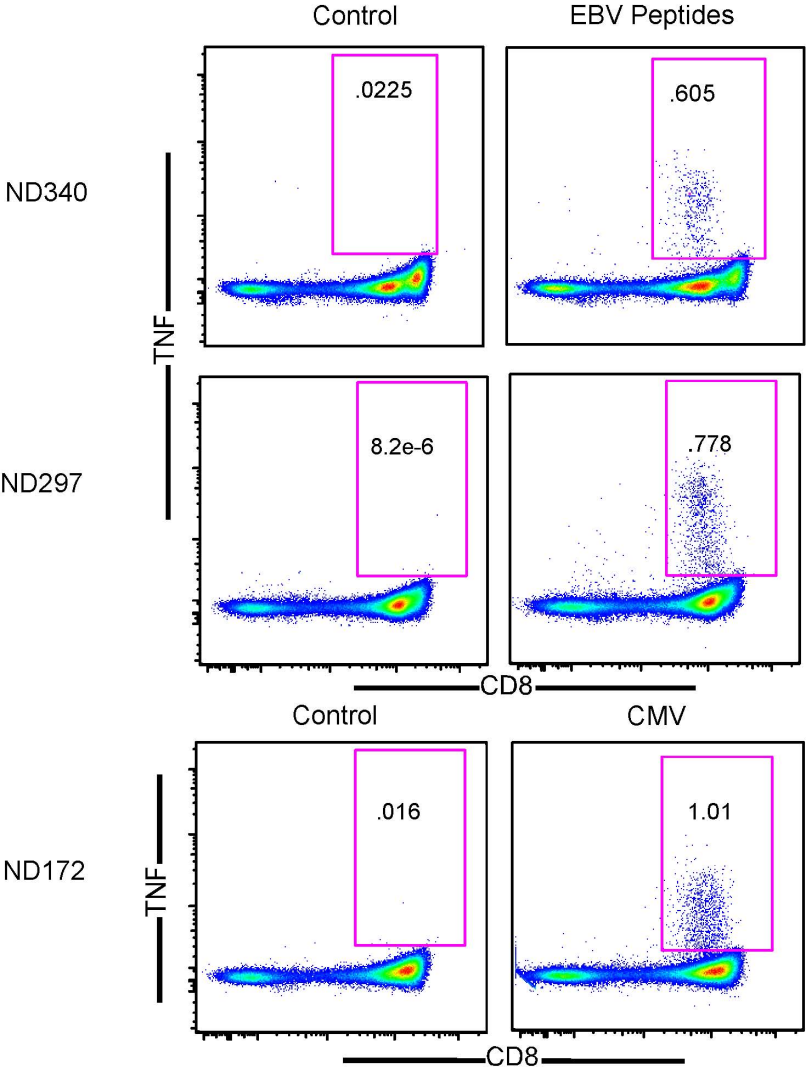

Supplement: NIHMS294555-supplement-03.pdf [file NIHMS294555-supplement-03.pdf]

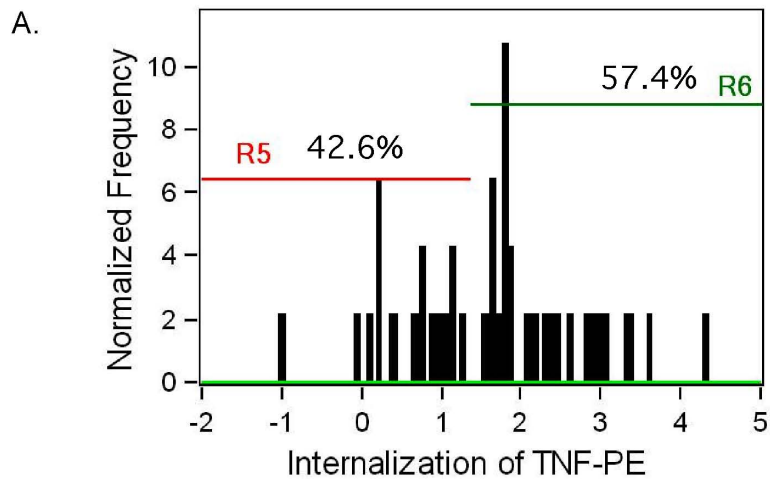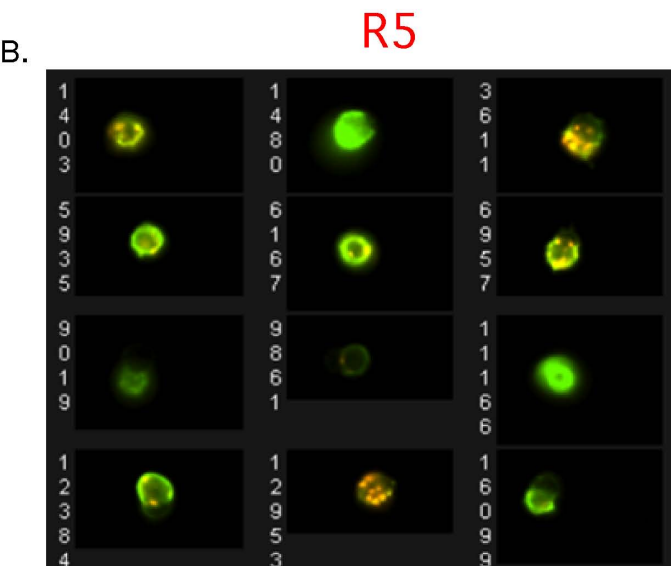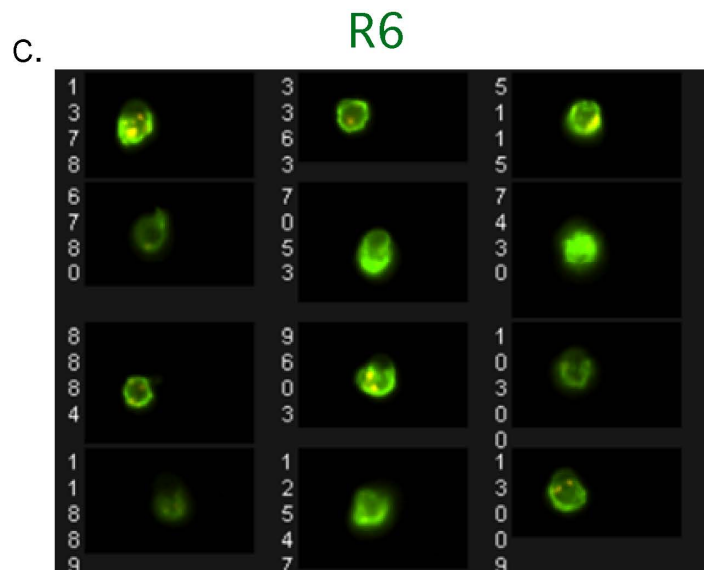

CD8-FITC:Green  
TNF-PE: Orange

Supplement: NIHMS294555-supplement-04.pdf [file NIHMS294555-supplement-04.pdf]
